# Supplementary material
Source: HighWire-hosted journal article supplement (https://lupus.bmj.com/content/10/2/e000920)
Supplement: inline-supplementary-material-1 [file inline-supplementary-material-1.pdf]

## **Altered hippocampal connectivity dynamics predicts memory performance in neuropsychiatric Lupus: A resting-state fMRI study using cross-recurrence quantification analysis.**

### **SUPPLEMENTARY MATERIAL**

#### ***Neuropsychological tests***

Neuropsychological testing was performed on 35 NPSLE patients largely employing tests recommended by the ACR (1) which have been standardized in the Greek population: i) *Digits Forward and Digits Backwards* subtests from the *Greek Memory Scale*; assessing verbal short-term and working memory (2,3), ii) *Rey Auditory Verbal Learning Memory Test (AVLT)*; assessing verbal episodic memory through the following indices: total number of words recalled across learning trials 1-5, delayed retention rate (2, 4), iii) *Trail Making Test (TMT)*; part A assessing visuomotor processing speed and part B assessing set shifting capacity (5), iv) the *Stroop Colour-Word Test (SCWT)* assessing cognitive interference (6), v) *Semantic and Phonetic Verbal Fluency* tests (7), vi) an experimental, abbreviated 25-problem version of the *General Adult Mental Ability (GAMA)* measure assessing nonverbal reasoning and problem-solving ability through Matching, Analogies, Sequences, and Construction problems (8).

#### **References**

1. The American College of Rheumatology nomenclature and case definitions for neuropsychiatric lupus syndromes. *Arthritis Rheum* 1999;42:599–608.
2. Constantinidou F, Zaganas I, Papastefanakis E, et al. Age-related decline in verbal learning is moderated by demographic factors, working memory capacity, and presence of amnesic

mild cognitive impairment. *Journal of the International Neuropsychological Society: JINS* 2014; 20: 822.

3. Simos P, Papastefanakis E, Panou T, et al. *The Greek memory scale*. Rethymno: Laboratory of Applied Psychology Rethymno, Crete, Greece: University of Crete 2011.
4. Geffen G, Geffen L and Research ACfE. *Auditory Verbal Learning Test (AVLT) [computer File]: Computerized Scoring Program and Population Norms*. 2000.
5. Zalonis I, Kararizou E, Triantafyllou N, et al. A normative study of the trail making test A and B in Greek adults. *Clinical Neuropsychologist* 2008; 22: 842-850.
6. Zafiri M and Kosmidis M. Effects of demographic characteristics on the " Stroop conflict". *Psychology: The Journal of the Hellenic Psychological Society* 2008; 15: 319-341.
7. Kosmidis MH, Vlahou CH, Panagiotaki P, et al. The verbal fluency task in the Greek population: Normative data, and clustering and switching strategies. *Journal of the International Neuropsychological Society: JINS* 2004; 10: 164.
8. Bardos A. *The General Ability Measure for adults*. In: McCallum S (ed) *Handbook of nonverbal assessment*. New York, NY: Kluwer Academic/Plenum Publishers, 2003, pp.163-174.
